# Supplementary material
Source: PubMed Central journal article supplement (PMC8084726)
Supplement: mmc1.pdf [file mmc1.pdf]

## **ISN-GKHA: Structures, organization, and services for the management of kidney failure in the Middle East**

### **Supplementary Tables, Figures, and Appendix**

**Table S1:** Burden of CKD and its risk factors in countries of the ISN Middle East region that participated in the ISN-GKHA survey.

**Figure S1:** Shortages of kidney failure care providers in the ISN Middle East region.

**Figure S2:** Availability of services to treat complications of kidney failure.

**Figure S3:** Registry characteristics for countries that reported having one or more registries in the ISN-GKHA survey.

**Figure S4:** National strategies available in countries.

**Figure S5:** Population covered under national non-communicable disease and chronic kidney disease strategies.

**Appendix:** Reference list for annual cost of kidney replacement therapy (for Table 1).

**Table S1:** Burden of chronic kidney disease and its risk factors in countries of the ISN Middle East region that participated in the ISN-GKHA survey.<sup>S1, S2</sup>

| Country                | CKD prevalence<br>% (95% CI) | Death attributed to<br>CKD % (95% CI) | DALYs attributed to<br>CKD % (95% CI) | Obesity<br>% (95% CI) | Increased BP<br>% (95% CI) |
|------------------------|------------------------------|---------------------------------------|---------------------------------------|-----------------------|----------------------------|
| Bahrain                | 9.28 (8.4 - 10.12)           | 4.00 (3.59 - 4.32)                    | 1.88 (1.64 - 2.13)                    | 28.7 (23.5 - 34.2)    | 21.4 (15.7 - 27.8)         |
| Iran, Islamic Republic | 10.57 (9.78 - 11.48)         | 2.67 (2.47 - 2.78)                    | 1.50 (1.38 - 1.63)                    | 25.5 (22.2 - 28.9)    | 19.7 (15.2 - 24.6)         |
| Iraq                   | 7.38 (6.85 - 7.99)           | 3.09 (2.82 - 3.31)                    | 1.55 (1.41 - 1.69)                    | 27.4 (22.7 - 32.4)    | 25.2 (19.1 - 31.6)         |
| Jordan                 | 7.37 (6.84 - 7.99)           | 4.66 (4.22 - 5.05)                    | 2.00 (1.76 - 2.24)                    | 33.4 (29.0 - 37.9)    | 21.0 (15.8 - 26.9)         |
| Kuwait                 | 8.39 (7.74 - 9.12)           | 2.29 (2.1 - 2.6)                      | 1.27 (1.12 - 1.43)                    | 37.0 (32.2 - 42.0)    | 23.6 (17.9 - 30.0)         |
| Lebanon                | 8.31 (7.7 - 9.07)            | 1.77 (1.59 - 1.99)                    | 1.14 (1.02 - 1.27)                    | 31.3 (26.2 - 36.6)    | 20.7 (15.4 - 26.8)         |
| Oman                   | 7.42 (6.82 - 8.07)           | 2.26 (1.84 - 2.5)                     | 1.29 (1.14 - 1.45)                    | 22.9 (18.3 - 27.9)    | 24.8 (18.9 - 31.5)         |
| Qatar                  | 7.13 (6.46 - 7.79)           | 3.07 (2.6 - 3.33)                     | 1.3 (1.13 - 1.48)                     | 33.9 (27.7 - 40.5)    | 22.4 (16.1 - 29.8)         |
| Saudi Arabia           | 7.20 (6.64 - 7.82)           | 4.04 (3.31 - 4.46)                    | 2.02 (1.73 - 2.28)                    | 35.0 (30.5 - 39.5)    | 23.3 (18.0 - 29.2)         |
| Syrian Arab Republic   | 8.02 (7.34 - 8.73)           | 1.97 (1.8 - 2.36)                     | 1.16 (1.05 - 1.29)                    | 25.8 (20.7 - 31.3)    | 24.5 (18.7 - 30.8)         |
| United Arab Emirates   | 7.67 (6.94 - 8.42)           | 3.14 (2.69 - 3.55)                    | 1.80 (1.54 - 2.08)                    | 29.9 (24.0 - 36.0)    | 21.1 (15.2 - 28.0)         |
| West Bank and Gaza     | -                            | -                                     | -                                     | -                     | -                          |
| Yemen                  | 5.24 (4.85 - 5.71)           | 1.19 (1.08 - 1.35)                    | 0.75 (0.68 - 0.84)                    | 14.1 (10.8 - 17.8)    | 30.7 (23.3 - 38.7)         |

Abbreviations: ISN: International Society of Nephrology; GKHA: Global Kidney Health Atlas; CKD: chronic kidney disease; DALYs: disability-adjusted life years; BP: blood pressure; CI: confidence interval

‘-’: Data not reported/unavailable.

**Figure S1:** Shortages of kidney failure care providers in the ISN Middle East region.

| Country                       | Nephrologists | Transplant surgeons | Surgeons (HD access) | Surgeons (PD access) | Interventional radiologists (HD access) | Interventional radiologists (PD access) | Laboratory technicians | Dietitians | Radiologists (ultrasound) | Vascular access coordinators | Counsellors/psychologists | Transplant coordinators | Dialysis nurses | Dialysis technicians | TOTAL SHORTAGE |
|-------------------------------|---------------|---------------------|----------------------|----------------------|-----------------------------------------|-----------------------------------------|------------------------|------------|---------------------------|------------------------------|---------------------------|-------------------------|-----------------|----------------------|----------------|
| <b>Total shortage</b>         | <b>8</b>      | <b>7</b>            | <b>3</b>             | <b>2</b>             | <b>9</b>                                | <b>9</b>                                | <b>5</b>               | <b>1</b>   | <b>1</b>                  | <b>8</b>                     | <b>9</b>                  | <b>7</b>                | <b>5</b>        | <b>5</b>             |                |
| <b>Iran, Islamic Republic</b> |               |                     |                      |                      |                                         |                                         |                        |            |                           |                              |                           |                         |                 |                      | <b>9</b>       |
| <b>Iraq</b>                   |               |                     |                      |                      |                                         |                                         |                        |            |                           |                              |                           |                         |                 |                      | <b>1</b>       |
| <b>Jordan</b>                 |               |                     |                      |                      |                                         |                                         |                        |            |                           |                              |                           |                         |                 |                      | <b>7</b>       |
| <b>Kuwait</b>                 |               |                     |                      |                      |                                         |                                         |                        |            |                           |                              |                           |                         |                 |                      | <b>5</b>       |
| <b>Lebanon</b>                |               |                     |                      |                      |                                         |                                         |                        |            |                           |                              |                           |                         |                 |                      | <b>3</b>       |
| <b>Oman</b>                   |               |                     |                      |                      |                                         |                                         |                        |            |                           |                              |                           |                         |                 |                      | <b>8</b>       |
| <b>Qatar</b>                  |               |                     |                      |                      |                                         |                                         |                        |            |                           |                              |                           |                         |                 |                      | <b>5</b>       |
| <b>Saudi Arabia</b>           |               |                     |                      |                      |                                         |                                         |                        |            |                           |                              |                           |                         |                 |                      | <b>10</b>      |
| <b>Syrian Arab Republic</b>   |               |                     |                      |                      |                                         |                                         |                        |            |                           |                              |                           |                         |                 |                      | <b>12</b>      |
| <b>United Arab Emirates</b>   |               |                     |                      |                      |                                         |                                         |                        |            |                           |                              |                           |                         |                 |                      | <b>10</b>      |
| <b>West Bank and Gaza</b>     |               |                     |                      |                      |                                         |                                         |                        |            |                           |                              |                           |                         |                 |                      | <b>9</b>       |

Abbreviations: ISN: International Society of Nephrology; HD: hemodialysis; PD: peritoneal dialysis;

|             |
|-------------|
| No shortage |
| Shortage    |

**Figure S2:** Availability of services to treat complications of kidney failure.

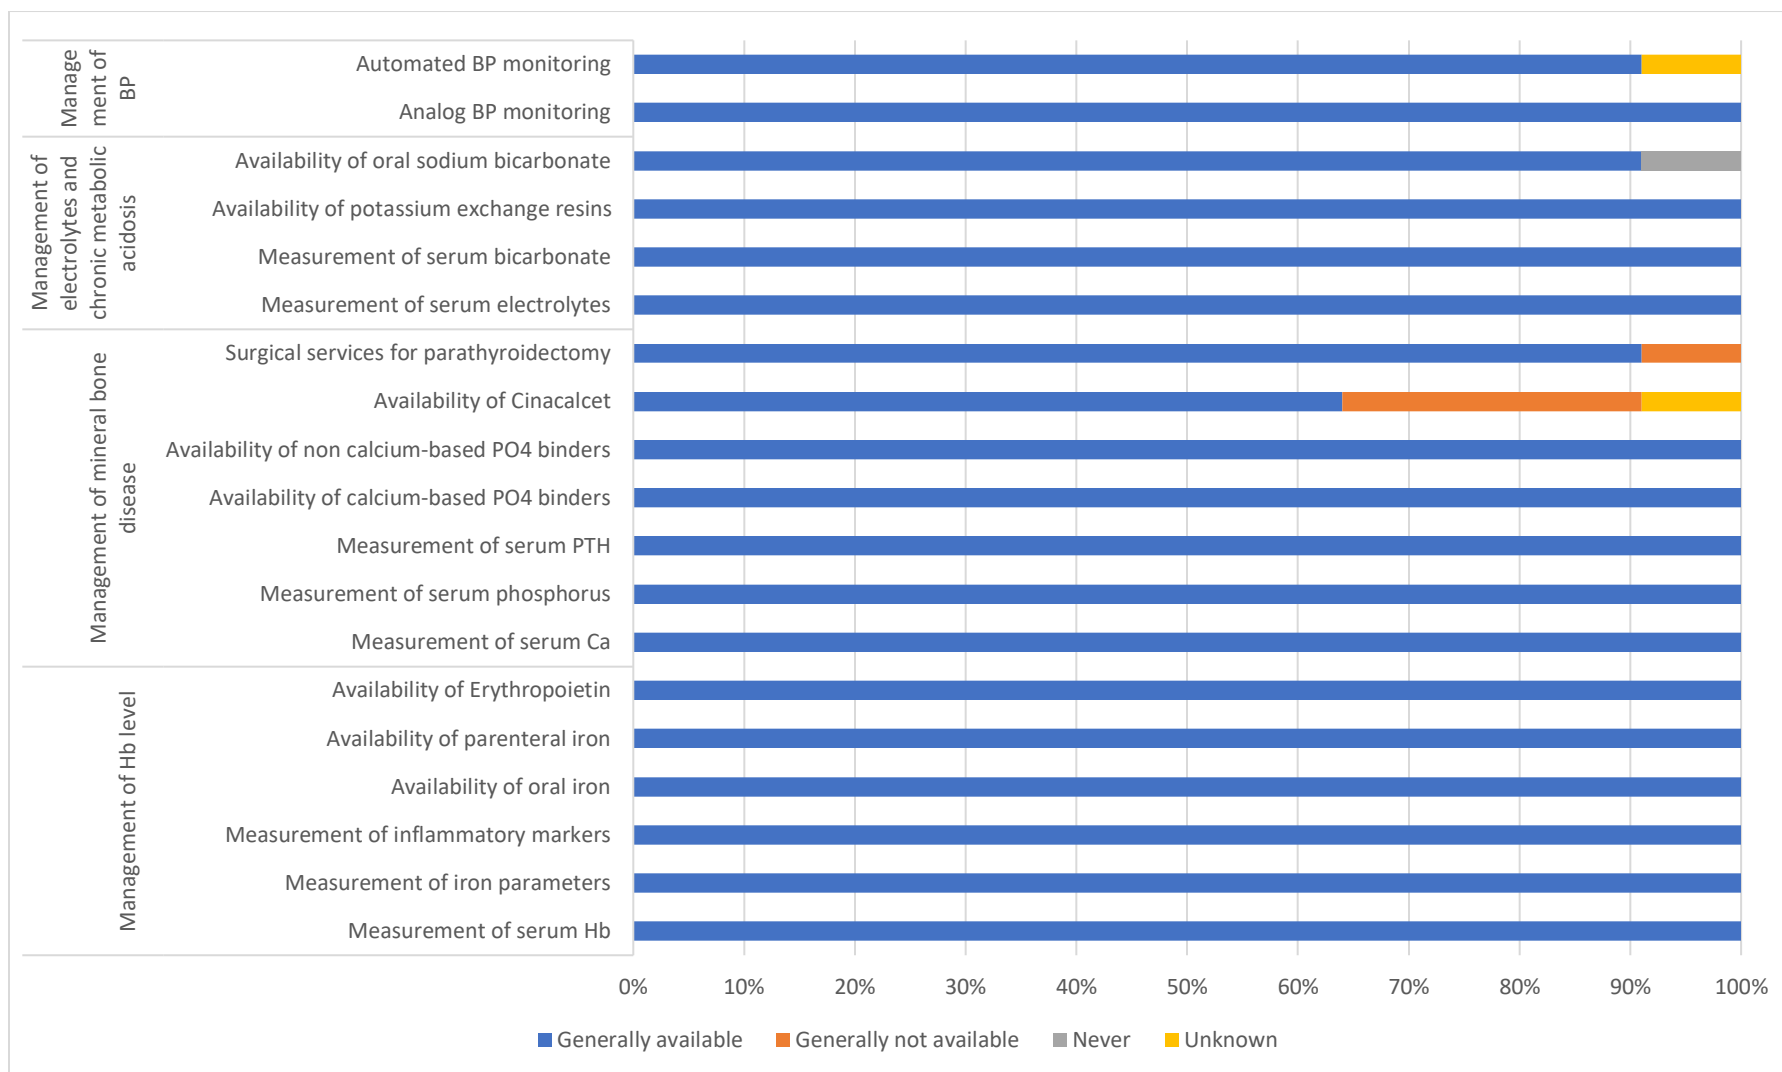

Abbreviations: BP: blood pressure; PO4: phosphate; PTH: parathyroid hormone; Ca: calcium; Hb: hemoglobin

**Figure S3:** Registry characteristics for countries that reported having one or more registries in the ISN-GKHA survey.

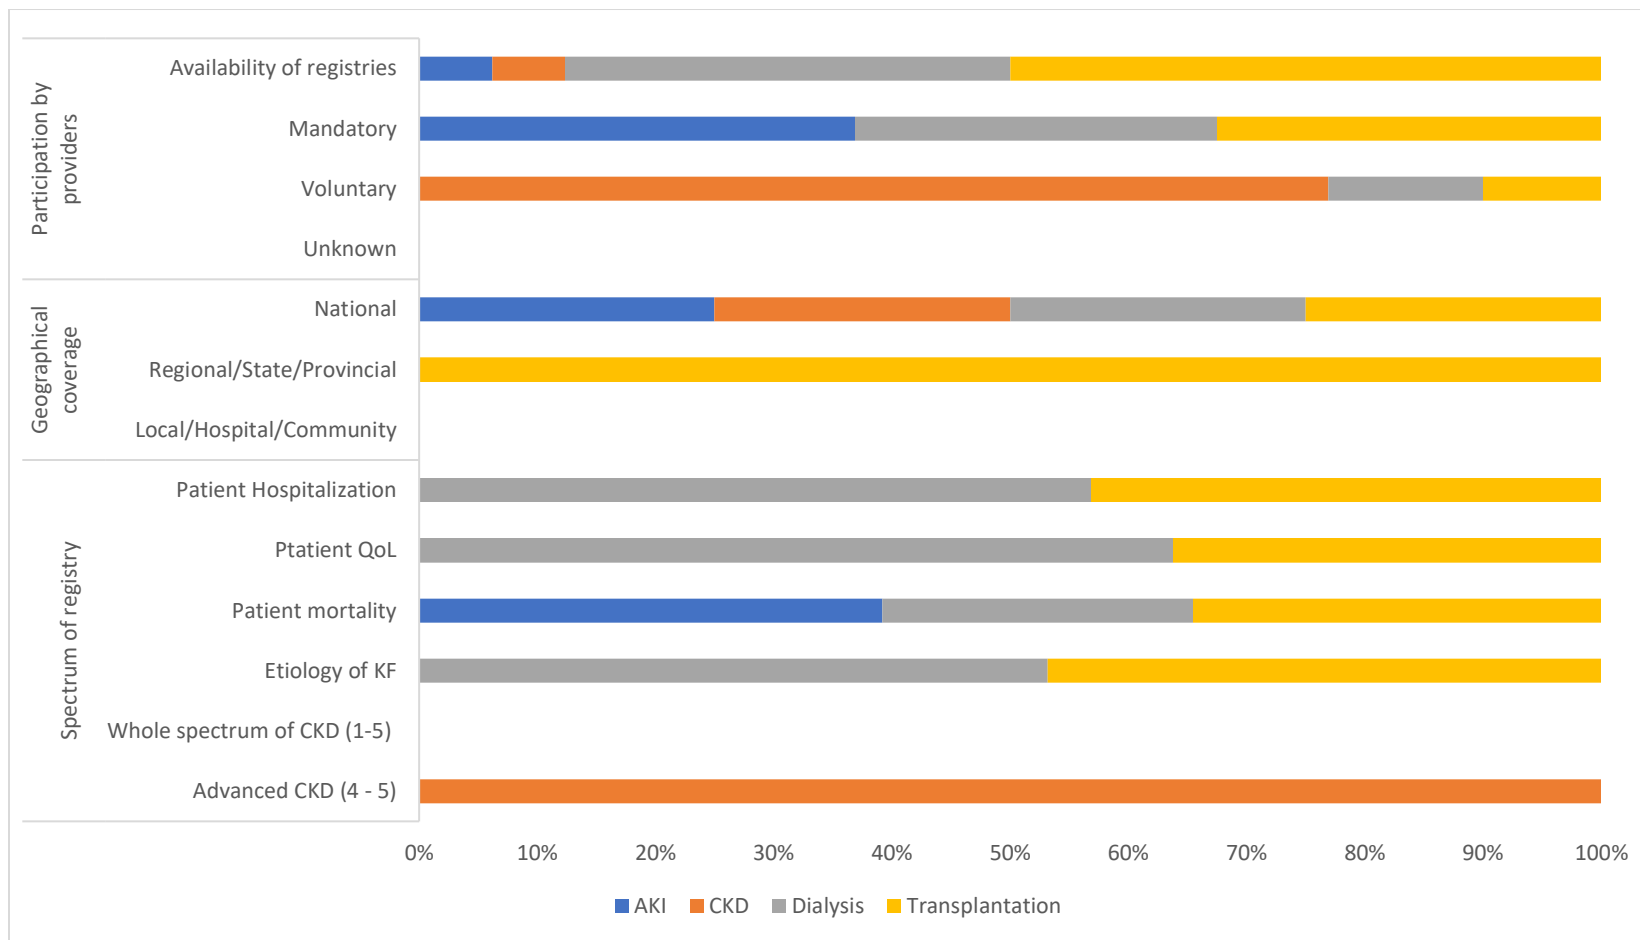

Abbreviations: ISN: International Society of Nephrology; GKHA: Global Kidney Health Atlas; QoL: quality of life; KF: kidney failure; CKD: chronic kidney failure

**Figure S4:** National strategies available in countries.

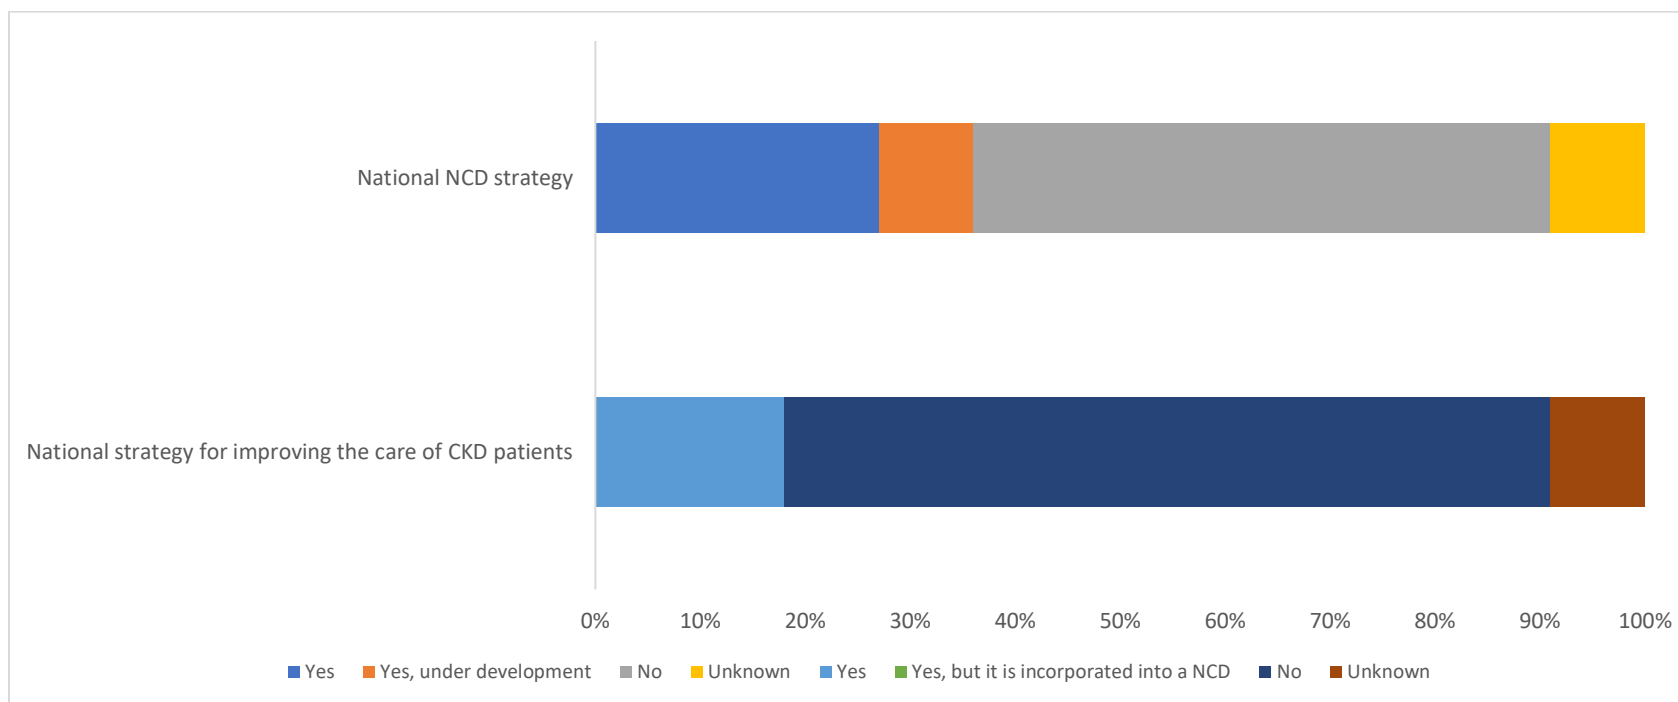

Abbreviations: NCD: non-communicable disease; CKD: chronic kidney failure

**Figure S5:** Population covered under national non-communicable disease and chronic kidney disease strategies.

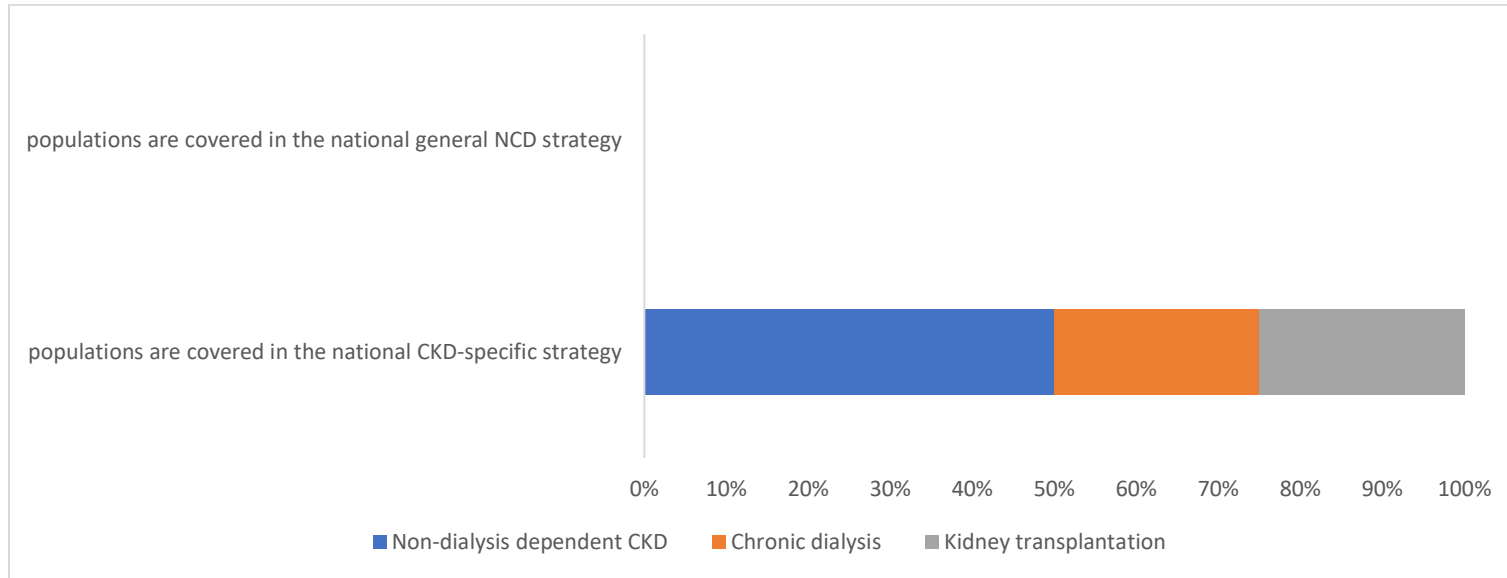

Abbreviations: NCD: non-communicable disease; CKD: chronic kidney failure

### **Supplementary References:**

- S1. Institute for Health Metrics and Evaluation. Global Burden of Disease Study 2017 (GBD 2017) Data Resources. Available at: <http://ghdx.healthdata.org/gbd-2017>. Accessed August 6, 2020.
- S2. World Health Organization. The Global Health Observatory. Available at: <https://www.who.int/gho/en/>. Published 2019. Accessed: August 6, 2020.

### **Appendix:** Reference list for annual cost of kidney replacement therapy (for Table 1).

- Al Arrayed, A., Al Tantawi, M., Fareed, E., Haider, F., & Abouna, G. (2000). Renal transplant is an established and successful treatment for end-stage renal failure in Bahrain, Bahrain Med. Bull, 22(2), 60-63.
- Al Saran, K., & Sabry, A. (2012). The cost of hemodialysis in a large hemodialysis center. Saudi Journal of Kidney Diseases and Transplantation, 23(1), 78.
- Ali, M., White, J., Lee, C. H., Palmer, J. L., Smith-Palmer, J., Fakhoury, W., & Valentine, W. J. (2008). Therapy conversion to biphasic insulin aspart 30 improves long-term outcomes and reduces the costs of type 2 diabetes in Saudi Arabia. Journal of medical economics, 11(4), 651-670.
- Al-Jedai, A., Alsultan, M., Almeshari, K., Alshaibani, K., Elgamal, H., Alkortas, D., ... & Hamawi, K. (2012). Cost analysis of kidney transplantation in highly sensitized recipients compared to intermittent maintenance hemodialysis. Ann Transplant, 17(4), 82-91.
- Al-Shdaifat, E., & Manaf, M. R. (2013). The economic burden of hemodialysis in Jordan. Indian Journal of Medical Sciences, 67(5/6), 103.
- Arefzadeh, A., Lessanpezeski, M., & Seifi, S. (2009). The cost of hemodialysis in Iran. Saudi Journal of Kidney Diseases and Transplantation, 20(2), 307.
- Batieha, A., Abdallah, S., Maghaireh, M., Awad, Z., Al Akash, N., Batieneh, A., & Ajlouni, K. A. (2007). Epidemiology and cost of haemodialysis in Jordan. EMHJ-Eastern Mediterranean Health Journal, 13 (3), 654-663, 2007.



- Mahdavi-Mazdeh, M., Zamani, M., Zamyadi, M., Rajolani, H., Tajbakhsh, K., Heidary Rouchi, A., ... & Mahdavi, A. (2008). Hemodialysis cost in Tehran, Iran. *Hemodialysis International*, 12(4), 492-498.
- Najafi, I., Hakemi, M., Safari, S., Atabak, S., Sanadgol, H., Nouri-Majalan, N., ... & Keshvari, A. (2010). The story of continuous ambulatory peritoneal dialysis in Iran. *Peritoneal dialysis international*, 30(4), 430-433.
- Nourbala, M. H., Einollahi, B., Kardavani, B., Khoddami-Vishte, H. R., Assari, S., Mahdavi-Mazdeh, M., & Simforoosh, N. (2007, May). The cost of kidney transplantation in Iran. In *Transplantation proceedings* (Vol. 39, No. 4, pp. 927-929). Elsevier.
- Rizk, R., Hiligsmann, M., Karavetian, M., Salameh, P., & Evers, S. M. (2016). A societal cost-of-illness study of hemodialysis in Lebanon. *Journal of medical economics*, 19(12), 1157-1166.
- van der Tol, A., Lameire, N., Morton, R. L., Van Biesen, W., & Vanholder, R. (2019). An international analysis of dialysis services reimbursement. *Clinical Journal of the American Society of Nephrology*, 14(1), 84-93.
- Younis, M., Jabr, S., Al-Khatib, A., Forgione, D., Hartmann, M., & Kisa, A. (2015). A cost analysis of kidney replacement therapy options in Palestine. *INQUIRY: The Journal of Health Care Organization, Provision, and Financing*, 52, 0046958015573494.
